# Supplementary material for: Effects of afforestation on water resource variations in the Inner Mongolian Plateau
Source: PeerJ. 2019 Nov 6;7:e7525. doi: 10.7717/peerj.7525 (PMC6842297; doi:10.7717/peerj.7525)
Supplement: Figure S5 [file peerj-07-7525-s006.xlsx]

## Sheet: Sheet1
年份	UF(k)	UB(k)		Mann-Kendall abrupt change test of water resource
1980	0	1.30761		UF	UB
1981	1	1.12191		UF:Statistical sequence of time series data
1982	0.522233	1.43797		UB:Statistical sequence of inverse time series
1983	1.35873	1.14659		Mann-Kendall test, which is a version of Kendall rank correlation coefficient
1984	1.95959	0.972987
1985	1.69081	0.832824
1986	1.95244	1.01694
1987	1.23718	1.01294
1988	1.66812	0.9088
1989	0.626099	1.0215
1990	1.32345	1.03595
1991	1.78289	1.12104
1992	1.3422	1.28983
1993	1.47811	1.13565
1994	1.1382	1.21251
1995	0.450225	0.78512
1996	0.823853	0.519109
1997	0.189389	1.01458
1998	0.804668	0.568166
1999	0.129777	1.31816
2000	-0.483151	1.08054
2001	-1.04332	0.742307
2002	-1.13565	0.0547449
2003	-0.84335	-0.122018
2004	-1.30788	-0.137145
2005	-1.60903	-0.856349
2006	-1.89707	-1.16276
2007	-2.17322	-2.29366
2008	-1.98835	-2.22692
2009	-1.98035	-1.65207
2010	-2.12455	-1.69081
2011	-2.20544	-0.979796
2012	-1.6734	-2.0381
2013	-1.23043	-1.5667
2014	-1.0367	-1
2015	-0.844495	0
