# Supplementary material for: Effects of afforestation on water resource variations in the Inner Mongolian Plateau
Source: PeerJ. 2019 Nov 6;7:e7525. doi: 10.7717/peerj.7525 (PMC6842297; doi:10.7717/peerj.7525)
Supplement: Table S1 [file peerj-07-7525-s007.xlsx]

## Sheet: Sheet1
year	1980	1981	1982	1983	1984	1985	1986	1987	1988	1989	1990	1991	1992	1993	1994	1995	1996	1997	1998	1999	2000	2001	2002	2003	2004	2005	2006	2007	2008	2009	2010	2011	2012	2013	2014	2015		mean	max	min	s-error	coef-Variance
Water resource	23.3272	34.1828	24.1218	39.2062	63.7065	35.7869	40.6901	28.2795	50.3308	14.1351	77.3542	74.8802	28.8062	50.2679	29.1	22.9626	59.4412	22.3348	125.654	7.09449	6.68232	4.03729	27.9215	45.7483	5.14136	13.4764	10.2215	10.0768	34.1828	26.2757	20.1086	22.7703	75.3867	74.5341	36.4365	38.1005		36.1879	125.654	4.03729	25.5793	0.706848
Precpitation	265.059	298.805	275.808	310.828	334.401	325.103	285.334	283.055	328.744	274.225	363.102	336.393	312.125	325.439	323.616	296.775	328.56	269.955	417.834	251.959	235.535	229.681	268.372	325.891	264.853	251.308	258.668	239.086	316.551	261.642	283.818	272.171	374.839	367.671	322.141	318.001		299.926	417.834	229.681	42.1252	0.140452
Temperature	2.71435	2.64745	3.63737	3.30028	2.25348	2.42492	2.90235	3.19251	3.32931	3.94512	4.15292	3.45923	3.45738	3.27194	4.0672	3.85984	3.19062	4.12241	4.76805	4.27075	3.55251	4.06988	4.45967	3.9045	4.36883	3.71378	4.08093	4.9653	4.26793	3.96	3.52294	3.69111	2.9503	4.06133	4.95049	5.45473		3.74838	5.45473	2.25348	0.71232	0.190034
Evapotranspiration	295.871	280.784	278.073	275.623	277.305	292.906	273.111	270.86	281.812	296.326	279.722	258.766	290.04	288.767	308.603	289.794	265.753	282.663	286.646	297.44	271.031	295.964	278.007	285.658	309.81	278.507	279.984	268.794	282.244	280.133	278.021	272.68	289.519	294.925	290.167	291.537		283.829	309.81	258.766	11.0847	0.0390543
NDVI			249.37	248.518	257.672	250.701	248.364	250.263	260.876	246.195	259.681	254.759	246.541	254.092	261.83	253.028	258.951	256.26	266.426	263.419	250.53	248.596	257.563	244.571	247.815	244.874	245.872	244.207	253.695	247.657	254.143	248.968	257.83	253.723	255.776	252.11		252.79	266.426	244.207	5.73182	0.0226742
Afforestation												502.5	417	435.4	371.92	429.31	451.23	464.41	477.82	533.89	589.98	731.87	907.39	836.12	630.92	383.83	256.52	590.14	718.56	861.93	655.18	731.837	781.617	805.156	559.247	668.018		591.672	907.39	256.52	170.56	0.288268
			Table1. The description of statistics of the various driving factors and water resources from 1980 to 2015.
				mean	maximum	minimum	standard error	coefficient of Variance
			Water resource	36.1879	125.654	4.03729	25.5793	0.706848
			NDVI	299.926	417.834	229.681	42.1252	0.140452
			Evapotranspiration	3.74838	5.45473	2.25348	0.71232	0.190034
			Precpitation	283.829	309.81	258.766	11.0847	0.0390543
			Temperature	252.79	266.426	244.207	5.73182	0.0226742
			Afforestation	591.672	907.39	256.52	170.56	0.288268
