# Supplementary material for: Effects of afforestation on water resource variations in the Inner Mongolian Plateau
Source: PeerJ. 2019 Nov 6;7:e7525. doi: 10.7717/peerj.7525 (PMC6842297; doi:10.7717/peerj.7525)
Supplement: Table S2 [file peerj-07-7525-s008.xlsx]

## Sheet: Sheet1
ID	WR	PREC	TEMP	DEM	SLOPE	ET	NDVI	VILLAGE	Inner Mongolia
0	0.56	0.67	0.06	1632.32	0.86	-0.11	0.24	43
1	0.64	0.69	0.06	1584.65	0.83	-0.36	0.28	0					WR-P	WR-T	WR-DEM	WR-SLOPE	WR-ET	WR-Village	Total Value
2	0.54	0.59	0.06	1437.31	1.02	-0.46	0.27	1				R2	0.61	0.001	0.204	0.008	0.236	0.02
3	0.35	0.6	0.06	1405.9	1.44	-0.39	0.61	8				Adjusted R2	0.609	-0.001	0.202	0.006	0.235	0.018
4	0.23	1.43	0.05	1365.76	0.63	0.49	1.43	81				Sig	0	0.412	0	0.042	0	0.001
5	0.59	1.54	0.05	1346.43	0.52	0.28	1.46	49				Standard coefficient	0.781	0.036	0.451	0.09	-0.486	-0.141	1.985
6	0.75	1.35	0.05	1308.89	2.08	0.32	1.54	83				Contribution	39.3451	1.8136	22.7204	4.53401	-24.4836	-7.10327
7	0.48	0.7	0.06	1451.73	0.46	-0.14	0.08	1
8	0.58	0.72	0.06	1407.56	0.58	-0.25	0.08	0				Table3. Regression results of relationships between the various driving factors and water resources after normalization.
9	0.6	0.75	0.06	1356.43	0.75	-0.37	0.13	0					R2	Adjusted R2	Contribution (%)	Standard coefficient
10	0.65	0.8	0.06	1422.34	1.14	-0.38	0.41	0				Precipitation	0.61	0.609	39.3451	0.781
11	0.05	1.13	0.05	1437.95	0.88	0.15	1.62	23				Temperature	0.001	-0.001	1.8136	0.036
12	0.3	1.54	0.04	1363.35	0.39	0.19	1.46	0				Evapotranspiration	0.236	0.235	-24.4836	-0.486
13	0.64	1.76	0.05	1337	0.45	0.11	1.13	2				DEM	0.204	0.202	22.7204	0.451
14	0.94	1.86	0.05	1207.54	0.8	0.31	1.14	29				Slope	0.008	0.006	4.53401	0.09
15	0.58	0.79	0.06	1339.85	0.74	-0.19	0.09	0				Village	0.02	0.018	-7.10327	-0.141
16	0.71	0.82	0.06	1350.37	2.39	-0.3	0.09	0
17	0.73	0.79	0.05	1330.55	0.84	-0.34	0.26	5				Table2. The correlation analysis on relationship among the various driving factors and water resources.
18	0.09	0.96	0.05	1348.65	1.01	0.01	0.82	0					WR	Precipitation	Temperature	Evapotranspiration	DEM	Slope	Village
19	0.02	1.17	0.04	1363.06	0.62	0.13	0.95	0				WR	1
20	0.2	1.56	0.05	1367.82	0.79	0.26	0.66	1				Precipitation	0.780791	1
21	0.6	1.98	0.05	1318.76	0.69	0.48	0.88	14				Temperature	0.0361495	0.213171	1
22	0.99	2.06	0.06	1236.86	0.46	0.59	0.84	68				Evapotranspiration	-0.486149	0.0149824	0.306304	1
23	0.37	0.88	0.05	1735.82	2.32	-0.05	0.07	6				DEM	0.451375	0.56539	0.495975	-0.0252252	1
24	0.56	0.94	0.05	1535.45	1.3	0.01	0.04	1				Slope	0.0895797	-0.226423	-0.335441	-0.498914	-0.0636466	1
25	0.62	0.88	0.05	1342.33	0.99	-0.13	0.03	0				Village	-0.140537	-0.0140269	0.0404966	0.204827	-0.0264427	0.0965129	1
26	0.63	0.81	0.05	1317.8	0.98	-0.18	0.13	0
27	0.57	0.65	0.05	1277.25	0.73	-0.31	0.04	0				WR:water resource
28	0.42	0.71	0.04	1714.63	7.06	-0.26	-0.07	7				PREC:precipitaion
29	-0.03	0.62	0.04	1219.02	0.88	0.19	0.44	19				TEMP:temperature
30	-0.21	0.66	0.04	1339.19	0.94	0.18	0.66	3				DEM:digital elevation model
31	-0.11	1.04	0.05	1418.44	0.88	0.34	0.52	1				Slope:slope
32	0.33	1.61	0.05	1338.32	0.59	0.49	0.78	2				ET:Evapotranspiration
33	0.62	1.85	0.06	1315.82	0.58	0.64	0.67	32				NDVI:Normalized difference vegetation index
34	0.2	0.73	0.05	1588.2	1.14	0.14	0	0				VILLAGE:village
35	0	0.54	0.05	1471.48	1.3	0.11	-0.01	0
36	0.19	0.55	0.04	1407.91	2.77	0.07	-0.02	0
37	0.31	0.61	0.04	1392.75	2.87	0.01	0.1	0
38	0.43	0.81	0.04	1376.23	1.87	-0.06	0.06	0
39	0.64	0.94	0.04	1304.4	0.57	-0.04	0.07	0
40	0.79	1.05	0.04	1303.33	1.03	-0.06	0.04	1
41	0.72	0.98	0.04	1256.7	0.78	-0.08	0.17	0
42	0.43	0.65	0.05	1156.34	0.76	-0.02	0.06	0
43	0.26	0.49	0.04	1162.2	1.32	0.05	-0.03	0
44	0.18	0.46	0.03	1241	2.61	0.13	-0.15	31
45	0.05	0.37	0.04	1469.87	2.58	0.06	-0.16	1
46	-0.2	0.35	0.04	1408.58	0.89	0.28	0.48	0
47	-0.29	0.65	0.05	1413.72	0.93	0.63	0.72	19
48	-0.13	1.11	0.06	1415.37	0.96	0.89	0.63	58
49	0.22	1.37	0.06	1378.03	1.29	0.79	0.5	74
50	0.64	1.5	0.07	1285.55	2.64	0.67	0.39	102
51	0.76	1.53	0.06	1201.18	4.4	0.62	0.76	158
52	0.62	1.37	0.05	1129.35	5.24	0.51	0.81	398
53	0.1	0.57	0.05	1434.13	1.69	0.18	-0.27	0
54	-0.02	0.5	0.05	1328.18	2.22	0.19	-0.15	0
55	-0.09	0.41	0.04	1287.22	4.85	0.17	-0.07	0
56	0.03	0.42	0.04	1283.07	5.91	0.12	-0.15	0
57	0.26	0.55	0.04	1353.32	6.92	0.06	-0.07	0
58	0.48	0.87	0.04	1578.56	2.64	0	0.09	0
59	0.68	1.15	0.04	1584.61	1.96	-0.03	0.12	0
60	0.94	1.28	0.04	1417.45	1.44	0	0.07	0
61	0.72	1.18	0.04	1471.21	1.01	0.02	0.13	1
62	0.66	0.97	0.04	1299.18	1.33	0.11	0.08	0
63	0.27	0.52	0.04	1033.61	0.43	0.16	0	0
64	0.18	0.43	0.04	1092.29	0.79	0.23	0.16	10
65	0.14	0.35	0.04	1398.48	1.66	0.27	-0.11	3
66	0	0.31	0.05	1269.02	0.83	0.35	0.4	7
67	-0.15	0.51	0.05	1286.28	0.88	0.63	0.43	1
68	-0.18	0.83	0.06	1459.99	1.48	0.99	0.29	21
69	0.04	1.05	0.06	1413.87	1.71	0.93	0.7	128
70	0.45	1.18	0.06	1353.61	2.37	0.68	0.65	101
71	0.52	1.29	0.07	1210.75	2.97	0.72	0.76	58
72	0.48	1.27	0.05	1212.31	4.72	0.43	0.5	104
73	0.42	1.32	0.05	1539.86	5.45	0.45	0.83	247
74	0.03	0.37	0.05	1187.53	1.22	0.18	-0.37	1
75	-0.03	0.38	0.05	1206.38	2.33	0.19	-0.3	0
76	-0.05	0.34	0.04	1163.15	2.67	0.17	-0.18	0
77	0.08	0.42	0.04	1205.7	3.02	0.16	-0.29	0
78	0.29	0.63	0.04	1286.3	2.09	0.11	-0.12	0
79	0.59	0.94	0.03	1326.59	0.97	0.08	-0.03	0
80	0.91	1.27	0.03	1430.05	1.1	0.05	0.1	0
81	0.95	1.43	0.03	1483.13	0.95	0.06	0.17	0
82	0.98	1.37	0.03	1333.73	1.02	0.12	0.14	0
83	0.84	1.31	0.04	1501.28	1.8	0.19	0.12	0
84	0.52	0.99	0.04	1307.31	1.97	0.27	0.14	1
85	0.46	0.76	0.04	1048.48	0.53	0.37	0.51	0
86	0.31	0.55	0.04	1090.68	0.6	0.37	0.74	49
87	0.18	0.45	0.05	1152.84	0.74	0.52	0	0
88	0.1	0.54	0.06	1182.69	1.09	0.61	0.18	4
89	-0.05	0.69	0.06	1156.35	1.01	0.81	0.64	43
90	-0.01	0.85	0.06	1095.56	0.78	0.85	0.45	81
91	0.24	1.02	0.06	1056.83	0.66	0.68	0.64	121
92	0.34	1.16	0.06	1026.96	0.42	0.61	0.56	251
93	0.3	1.27	0.06	1072.82	1.24	0.76	0.58	152
94	0.3	1.12	0.05	1333.87	4.45	0.39	0.54	114
95	0.14	0.53	0.06	1484.05	4.23	0.18	0.63	305
96	0.24	0.65	0.02	1584.35	1.16	0.24	-0.18	0
97	0.02	0.3	0.04	1132.15	0.65	0.2	-0.26	1
98	-0.05	0.23	0.05	1058.76	0.18	0.2	-0.44	0
99	-0.03	0.24	0.05	1020.9	0.3	0.18	-0.15	0
100	0.08	0.4	0.04	1150.46	3.38	0.18	-0.25	0
101	0.26	0.65	0.04	1300.17	3.16	0.17	-0.18	0
102	0.45	0.94	0.03	1441.98	0.9	0.14	-0.06	0
103	0.58	1.08	0.03	1360.16	0.95	0.13	-0.06	1
104	0.72	1.24	0.03	1336.31	1.27	0.16	-0.05	1
105	0.75	1.38	0.03	1327.67	1.24	0.19	-0.03	0
106	0.77	1.35	0.04	1250.46	0.89	0.23	-0.01	0
107	0.88	1.6	0.04	1464.56	1.53	0.35	0.08	0
108	0.77	1.48	0.04	1378.31	6.01	0.35	0.09	40
109	0.71	1	0.05	1039.21	0.25	0.21	0.21	194
110	0.47	0.77	0.06	1037.69	0.24	0.32	0.41	77
111	0.31	0.76	0.06	1030.76	0.27	0.55	0.26	73
112	-0.18	0.65	0.06	1188.1	3.55	0.88	0.8	31
113	-0.19	0.65	0.06	1324.62	3.84	1	0.39	72
114	-0.01	0.77	0.06	1436.06	4.73	0.67	0.28	106
115	0.12	0.78	0.06	1455.94	7.08	0.62	-0.19	151
116	0.34	1.22	0.06	1189.96	3.81	0.72	0.1	260
117	0.38	0.79	0.06	1286.65	3.55	0.26	0.38	193
118	0.12	0.21	0.06	1507.68	4.28	-0.04	0.26	187
119	0.12	-0.12	0.05	1415.27	2.85	-0.25	0.44	208
120	-0.05	-0.34	0.04	1458.43	5.77	-0.14	0.46	186
121	0.09	0.37	0.03	1392.87	1.16	0.21	-0.15	0
122	0.06	0.35	0.02	1378.07	0.9	0.19	-0.09	1
123	0.13	0.43	0.03	1351.73	1.18	0.22	-0.24	0
124	-0.02	0.21	0.04	1128.88	1.28	0.19	-0.26	0
125	-0.03	0.2	0.05	1029.47	0.2	0.17	-0.38	0
126	-0.02	0.26	0.05	984.57	0.28	0.2	-0.28	0
127	0.09	0.39	0.04	1029.62	1.55	0.19	-0.2	0
128	0.24	0.56	0.04	1046.72	1.57	0.17	-0.2	0
129	0.45	0.79	0.04	1077.01	1.04	0.16	-0.16	0
130	0.61	0.95	0.03	1025.78	1.32	0.15	-0.29	0
131	0.68	0.99	0.04	885.6	0.97	0.16	-0.38	0
132	0.88	1.29	0.04	937.7	1.19	0.18	-0.23	0
133	0.97	1.48	0.04	1011.06	1.02	0.23	-0.05	0
134	0.97	1.76	0.04	1244.88	1.02	0.33	0.02	0
135	1.09	2.14	0.04	1786.6	3.14	0.5	0.07	2
136	0.81	1.69	0.05	1408.91	5.41	0.59	-0.13	42
137	0.6	1.26	0.06	1187.06	2.23	0.67	-0.24	53
138	0.38	1.08	0.06	1126.52	1.33	0.68	0.1	55
139	0.03	0.84	0.06	1299.36	2.18	0.89	0.33	23
140	-0.24	0.53	0.06	1556.4	1.99	0.8	0.46	50
141	-0.41	0.25	0.06	1623.47	2.15	0.7	0.1	85
142	-0.15	-0.03	0.06	1788.84	2.71	0.29	-0.08	57
143	-0.19	0.04	0.06	1662.38	3.3	0.37	0.16	90
144	-0.44	-0.56	0.06	1720.78	6.75	0.32	0.46	102
145	-0.59	-1.02	0.06	1729.53	4.26	-0.22	0.26	132
146	-0.16	-0.61	0.05	1455.58	2.36	-0.38	0.29	360
147	-0.25	-0.49	0.04	1375.52	2.51	0.03	0.66	217
148	0.06	0.32	0.03	1441.42	1.42	0.2	-0.26	0
149	0.02	0.25	0.03	1265.51	0.92	0.19	-0.24	0
150	-0.06	0.08	0.03	1119.01	0.93	0.17	-0.34	0
151	-0.07	0.07	0.04	994.44	0.27	0.17	-0.49	0
152	-0.03	0.18	0.05	985.53	0.17	0.17	-0.22	1
153	0.02	0.28	0.05	950.15	0.33	0.17	-0.42	0
154	0.09	0.37	0.05	926.51	0.59	0.18	-0.44	0
155	0.2	0.57	0.04	1020.25	1.03	0.19	-0.49	0
156	0.34	0.81	0.04	1050.47	0.74	0.18	-0.51	0
157	0.37	0.99	0.04	1029.6	0.76	0.14	-0.33	0
158	0.4	1.13	0.04	922.24	0.69	0.12	-0.5	0
159	0.35	1.37	0.04	800.7	0.54	0.08	-0.43	0
160	0.57	1.65	0.04	921.28	0.63	0.15	-0.12	0
161	0.98	1.85	0.04	1061.47	0.76	0.3	-0.06	0
162	1.25	2.09	0.05	1251.97	0.9	0.44	0.11	0
163	1.19	2.17	0.05	1490.1	1.49	0.63	-0.02	1
164	0.94	1.81	0.06	1540.79	1.72	0.69	-0.11	0
165	0.43	1.36	0.06	1435.08	1.56	0.7	0.22	5
166	-0.16	0.79	0.06	1598.05	1.9	0.91	0.47	3
167	-0.53	0.28	0.06	1602.01	1.37	0.96	0.14	4
168	-0.59	0	0.06	1472.68	1.36	0.7	0.17	16
169	-0.43	-0.07	0.06	1526.33	1.36	0.55	0.16	14
170	-0.21	0.02	0.06	1500.27	1.37	0.45	0.02	48
171	-0.18	-0.32	0.06	1660.95	2.69	0.26	0.38	87
172	-0.26	-0.54	0.06	1567.66	1.78	0.16	0.36	115
173	-0.27	-0.87	0.06	1470.11	1.94	-0.15	0.63	249
174	-0.16	-0.48	0.05	1353.66	1.07	-0.02	0.74	256
175	0.03	0.23	0.03	1511.46	1.08	0.17	-0.27	0
176	-0.02	0.14	0.03	1379.51	1.1	0.17	-0.41	0
177	-0.07	0.01	0.04	1138.65	1.44	0.16	-0.51	0
178	-0.08	0.05	0.04	961.92	0.53	0.16	-0.55	0
179	-0.02	0.16	0.05	937.2	0.2	0.14	-0.43	0
180	0.04	0.29	0.05	924.59	0.29	0.12	-0.37	1
181	0.09	0.47	0.05	1008.48	0.96	0.19	-0.48	0
182	0.14	0.72	0.04	1121.99	0.96	0.1	-0.46	0
183	0.1	0.9	0.04	1201.57	0.85	0.07	-0.43	0
184	0.2	1.92	0.05	925.28	0.57	0.06	-0.29	0
185	0.62	2	0.05	951.61	0.63	0.2	-0.19	0
186	0.89	2.13	0.05	1163.21	0.92	0.39	-0.18	0
187	0.81	1.92	0.06	1263.51	0.82	0.52	-0.39	0
188	0.44	1.47	0.06	1260.1	0.72	0.54	-0.26	0
189	0	0.9	0.06	1321.58	1.01	0.59	-0.04	1
190	-0.41	0.38	0.05	1307.49	1.02	0.74	0.22	1
191	-0.6	0.05	0.05	1261.83	1.03	0.63	0.11	0
192	-0.58	-0.04	0.06	1255.54	0.89	0.61	0.1	1
193	-0.37	-0.03	0.06	1349.35	1.37	0.68	0.37	1
194	-0.29	-0.16	0.06	1476.66	1.94	0.63	0.69	8
195	-0.26	-0.15	0.05	1393.52	1.88	0.51	0.37	31
196	-0.29	-0.65	0.06	1487.48	2.24	0.16	0.45	150
197	0.01	-0.33	0.05	1473.84	2.06	-0.03	0.44	124
198	0.12	0.4	0.05	1441.96	1.82	0.38	0.32	106
199	-0.04	0.46	0.05	1448.48	1.91	0.82	0.41	108
200	-1.38	-0.47	0.03	1107.12	9.72	0.81	0.78	113
201	-1.21	-0.27	0.03	838.96	6.23	0.81	0.82	198
202	-0.77	0.19	0.03	594.91	3.99	0.41	1.07	219
203	0.07	0.15	0.04	1392.27	1.07	0.09	-0.49	0
204	0.01	0.11	0.03	1252.7	1.24	0.09	-0.45	0
205	-0.02	0.08	0.03	1106.4	1.04	0.08	-0.54	0
206	-0.05	0	0.04	978.76	1.11	0.07	-0.5	0
207	-0.04	0.07	0.04	1034.1	1.19	0.11	-0.47	0
208	0	0.2	0.05	935.99	0.56	0.13	-0.41	0
209	0.04	0.37	0.05	945.17	0.34	0.12	-0.5	0
210	-0.01	0.54	0.05	1052.49	0.47	0.03	-0.51	0
211	0	1.51	0.06	1150.89	0.75	0	-0.35	0
212	0	0.87	0.06	1215.89	1.06	0	-0.34	0
213	-0.16	0.3	0.05	1194.51	1.03	0.22	-0.24	0
214	-0.54	-0.07	0.05	1126.45	0.81	0.47	-0.41	1
215	-0.58	-0.11	0.06	1062.16	0.7	0.54	-0.38	1
216	-0.5	-0.16	0.06	1203.31	0.81	0.77	-0.06	0
217	-0.44	-0.11	0.06	1234.54	0.91	0.88	0.48	0
218	-0.36	0.07	0.05	1175.11	1.15	0.68	0.58	0
219	-0.23	0.02	0.05	1236.96	1.63	0.45	0.42	0
220	0.02	0.06	0.05	1283.4	1.92	0.25	0.07	7
221	0.32	0.31	0.06	1307.54	2.09	0.1	-0.12	47
222	0.4	0.42	0.06	1366.89	2.3	0.09	-0.05	42
223	0.23	0.39	0.06	1376.01	2.21	0.36	-0.1	40
224	-0.73	-0.44	0.07	1315.06	2.4	0.77	-0.17	43
225	-0.96	-0.24	0.03	1103.03	8	0.27	0.36	123
226	-1.04	-0.34	0.02	825.62	5.59	0.37	0.52	151
227	-1.02	-0.22	0.02	636.37	2.58	0.52	1.05	192
228	-0.89	-0.03	0.03	615.11	5.35	1.19	1.27	174
229	0	0.08	0.04	1178.48	0.55	0.02	-0.49	0
230	-0.1	-0.18	0.05	1030.98	0.8	0.1	-0.17	0
231	-0.49	-0.32	0.06	1044.02	0.83	0.57	-0.54	0
232	-0.56	-0.33	0.06	1041.27	0.67	0.69	-0.22	1
233	-0.49	-0.18	0.06	1099.54	0.58	0.74	-0.28	1
234	-0.4	0.15	0.05	1048.74	0.66	0.64	-0.03	2
235	-0.22	0.49	0.05	1051.46	0.87	0.47	0.34	0
236	-0.07	0.6	0.05	1104.02	0.91	0.52	0.35	1
237	0.19	0.61	0.06	1171.94	0.79	0.5	-0.04	2
238	0.31	0.51	0.06	1261.41	0.82	0.5	-0.19	2
239	0.16	0.27	0.06	1338.67	1.15	0.5	-0.25	2
240	-0.52	-0.46	0.07	1368.84	1.27	0.49	-0.35	4
241	-1.09	-1.03	0.08	1532.16	3.48	0.55	-0.09	6
242	-1.11	-1.03	0.06	1488.43	8.12	0.08	-0.37	53
243	-1.03	-0.29	0.02	1023.02	5.83	0.19	0.18	86
244	-1.03	-0.57	0.02	686.82	3.26	-0.09	0.03	127
245	-1.35	-0.9	0.02	603.83	3.06	0.69	0.46	125
246	-1.29	-0.75	0.02	651.18	3.78	1.08	0.98	86
247	-1.07	-0.12	0.02	380.13	3.07	1.05	1	156
248	-0.26	-0.54	0.06	1137.94	0.99	0.26	-0.18	0
249	-0.5	-0.45	0.07	1005.11	0.69	0.48	-0.11	0
250	-0.6	-0.26	0.06	1025.61	0.53	0.66	0.12	1
251	-0.46	0.07	0.06	1031.87	0.67	0.63	0.11	1
252	-0.36	0.42	0.05	1027.66	0.77	0.54	-0.13	0
253	-0.19	0.59	0.05	1058.1	0.95	0.51	0.14	0
254	0.17	0.72	0.06	1099.17	0.72	0.44	0.04	1
255	0.3	0.53	0.06	1212.14	0.66	0.58	0.11	1
256	0.16	0.21	0.06	1294.16	0.71	0.54	0.02	0
257	-0.29	-0.39	0.06	1320.5	0.9	0.34	-0.15	2
258	-0.98	-1	0.06	1335.29	4.33	0.25	-0.18	12
259	-1.06	-0.75	0.04	1349.16	7.77	0.09	-0.37	41
260	-1.52	-0.99	0.03	1049.73	5.11	0.26	-0.18	77
261	-1.67	-1.34	0.02	698.02	2.43	0.23	-0.24	77
262	-1.76	-1.66	0.02	508.12	1.71	0.56	-0.41	56
263	-1.64	-1.37	0.02	431.66	0.82	0.75	0.43	87
264	-1.28	-0.63	0.02	413.06	1.29	1.29	1.06	113
265	-0.66	-0.07	0.02	348.79	2.01	0.89	1.17	90
266	-0.42	-0.52	0.07	1015.76	0.84	0.36	0.05	0
267	-0.67	-0.34	0.07	977.54	0.74	0.59	-0.04	0
268	-0.56	0.01	0.06	986.53	0.54	0.61	0.16	1
269	-0.53	0.07	0.05	1072.71	1.19	0.63	0.02	1
270	-0.32	0.38	0.05	1073.49	0.86	0.52	0.17	0
271	-0.06	0.49	0.06	1122.48	1	0.63	0.32	1
272	0.1	0.54	0.06	1132.13	1.14	0.69	0.33	0
273	0.12	0.44	0.06	1285.14	1.48	0.63	0.42	0
274	-0.3	-0.23	0.06	1274.3	1.49	0.63	0.39	1
275	-1.18	-1.24	0.05	1400.12	4.77	0.68	0.36	12
276	-1.33	-0.92	0.04	1072.09	6.61	0.41	-0.44	50
277	-1.58	-1.07	0.03	742.23	3.23	0.05	-0.56	40
278	-1.59	-1.68	0.03	566.2	1.44	-0.27	-0.4	5
279	-1.79	-2.1	0.03	435.84	0.59	0.14	-0.17	4
280	-1.6	-1.72	0.03	352.27	0.38	0.45	0.07	12
281	-1.07	-0.92	0.03	316.76	0.25	0.62	0.55	71
282	-0.61	-0.31	0.03	288.02	0.45	0.53	0.3	8
283	-0.19	-0.13	0.03	248.22	0.44	0.53	0.25	12
284	-0.37	-0.31	0.03	171.15	0.53	1.03	0.84	74
285	-0.76	-0.71	0.07	1062.18	0.99	0.56	0.24	0
286	-0.73	-0.68	0.07	1125.33	1.07	0.69	0.55	1
287	-0.66	-0.47	0.06	1084.38	1.04	0.75	0.29	0
288	-0.53	-0.05	0.05	1036.95	0.77	0.72	0.15	0
289	-0.48	0.1	0.06	1055.63	1	0.69	0.29	0
290	-0.34	0.16	0.06	1197.87	1.46	0.71	0.21	1
291	-0.25	0.26	0.06	1157.88	1.47	0.84	0.7	0
292	-0.15	0.38	0.05	1085.54	1.8	0.69	0.2	3
293	-0.38	-0.42	0.05	1249.25	1.91	0.3	0.22	0
294	-1.2	-1.4	0.05	1418.13	5.48	0.39	-0.05	8
295	-1.44	-1.25	0.04	1023.72	5.53	0.26	-0.14	73
296	-1.21	-1.26	0.04	865.26	4.27	-0.52	-0.78	27
297	-1.58	-2	0.04	669.02	3.17	-0.29	-0.99	50
298	-1.5	-2.14	0.04	419.58	1.26	0.02	-0.34	90
299	-1.33	-1.84	0.04	316.48	0.4	0.15	-0.09	56
300	-0.97	-1.08	0.04	259.63	0.27	0.51	0.46	191
301	-0.56	-0.59	0.03	218.03	0.24	0.56	0.48	126
302	-0.25	-0.54	0.04	198.4	0.29	0.23	0.17	76
303	-0.28	-0.67	0.03	175.5	0.39	0.63	0.12	1
304	-1.36	-0.8	0.03	117.4	0.36	1.29	0.45	115
305	-0.78	-0.9	0.07	1078.45	0.81	0.49	0.82	0
306	-0.81	-0.93	0.06	1142.14	0.73	0.68	0.75	0
307	-0.56	-0.96	0.06	1261.25	1.3	0.61	0.61	1
308	-0.55	-0.74	0.06	1222.43	1.42	0.67	0.66	0
309	-0.71	-0.62	0.06	1182.23	0.99	0.94	0.54	1
310	-0.65	-0.31	0.06	1158.14	1.11	0.91	0.29	1
311	-0.49	0.01	0.06	1097.18	1.43	0.65	0.14	0
312	-0.43	0.12	0.05	1000.67	1.29	0.62	-0.24	1
313	-0.7	-0.68	0.05	1110.89	1.76	0.41	-0.11	1
314	-1.01	-1.13	0.04	1138.58	2.08	0.31	-0.28	1
315	-1.71	-2.15	0.04	1211.46	5.01	0.21	-0.3	20
316	-1.43	-2.37	0.04	1069.87	6.4	-0.56	-0.46	29
317	-1.34	-1.81	0.04	716.47	5.06	-0.13	-0.62	146
318	-1.56	-2.11	0.04	498.77	2.34	0.01	-0.38	137
319	-1.31	-1.82	0.04	333.64	1.15	-0.09	-0.77	5
320	-0.89	-1.16	0.04	234.44	0.28	0.05	-0.41	63
321	-0.61	-0.84	0.04	195.51	0.24	0.51	0.61	67
322	-0.65	-0.93	0.04	168.1	0.21	0.63	0.62	148
323	-1.04	-1.15	0.04	150.4	0.38	0.85	0.6	51
324	-1.64	-1.38	0.03	133.24	0.37	1.13	0.55	164
325	-0.07	-1.03	0.06	1075.51	0.55	0.05	1.51	0
326	-0.18	-1.05	0.06	1083.97	0.6	0.13	1.56	0
327	-0.52	-1.29	0.06	1411.24	1.6	0.58	0.67	0
328	-0.74	-0.99	0.06	1286.44	1.53	0.61	-0.04	1
329	-0.7	-0.36	0.06	1029.67	0.99	0.54	-0.43	1
330	-0.68	-0.11	0.05	893.84	0.71	0.39	-0.28	1
331	-0.71	-0.54	0.05	1018.7	1.29	0.31	0.02	0
332	-0.83	-1.14	0.05	1008.72	1.33	0.19	-0.43	2
333	-0.96	-1.69	0.05	1122.97	3.01	-0.1	-0.65	1
334	-1.23	-2.21	0.05	1181.92	5.5	-0.2	-0.73	1
335	-2.32	-2.95	0.05	877.33	5.92	-0.09	-0.51	20
336	-2.09	-2.46	0.04	581.17	3.47	0	-0.84	8
337	-1.57	-1.9	0.04	389.14	2.28	0.15	-0.43	56
338	-1.03	-1.31	0.04	214.35	0.38	0.06	0.07	2
339	-0.62	-1.18	0.04	179.95	0.25	-0.1	0.23	3
340	-0.8	-1.24	0.04	158.03	0.23	0.32	0.53	9
341	-1.11	-1.3	0.04	145.99	0.26	0.67	0.8	86
342	-0.52	-1.65	0.06	1447.55	1.38	0.35	-0.05	0
343	-0.63	-1.44	0.06	1381.72	1.84	0.38	-0.31	0
344	-0.69	-0.76	0.06	1108.17	1.86	0.35	-0.55	0
345	-0.86	-0.4	0.05	889.38	1.26	0.24	-0.39	1
346	-0.84	-0.64	0.05	924.29	1.33	0.33	-0.2	0
347	-0.69	-0.75	0.05	917.64	1.15	0.55	-0.03	0
348	-0.59	-1.05	0.05	925.56	0.98	0.38	-0.24	1
349	-1.15	-2.06	0.05	1022.5	2.2	-0.04	-0.62	0
350	-2.32	-3.17	0.05	1013.75	5.42	0.11	-0.56	0
351	-2.52	-2.97	0.04	777.78	5.17	0.04	-0.43	10
352	-1.97	-2.03	0.04	486.27	4.12	0.22	-0.37	10
353	-1.29	-1.54	0.04	243.96	0.95	0.37	0.02	2
354	-1	-1.49	0.03	179.51	0.31	0.2	0.2	11
355	-0.66	-0.71	0.05	955.72	2.43	0.29	-0.06	0
356	-0.81	-0.96	0.06	984.12	1.81	0.43	0.26	1
357	-0.59	-0.79	0.06	892.12	1.36	0.48	0.75	2
358	-0.42	-0.74	0.06	858.58	0.65	0.43	0.06	0
359	-1.03	-1.6	0.05	897.07	0.85	0.3	-0.49	1
360	-2.11	-2.88	0.05	980.02	3.83	0.23	-0.53	7
361	-2.77	-2.8	0.04	772.02	5.16	0.54	-0.27	1
362	-1.98	-2.11	0.04	512.63	4.06	0.05	-0.74	1
363	-1.52	-1.75	0.03	305.5	1.64	0.28	-0.38	56
364	-1.62	-1.78	0.03	179.38	0.37	0.65	0.06	14
365	-0.35	-0.74	0.05	878.78	1.46	0.29	0.34	0
366	-0.4	-0.56	0.05	969.1	1.57	0.68	0.43	0
367	-0.4	-0.33	0.06	951.6	1.65	0.84	0.21	1
368	-0.23	-0.53	0.06	966.1	2.28	0.39	-0.39	0
369	-0.38	-1.22	0.05	966.56	2.36	0.19	-0.32	0
370	-1.76	-2.37	0.05	966.94	3.12	0.23	-0.48	0
371	-2.42	-2.22	0.04	798.02	4.74	0.68	-0.27	3
372	-2.16	-1.98	0.04	656.91	5.75	0.44	-0.56	31
373	-2.13	-1.86	0.03	386.5	2.79	0.9	0.1	121
374	-0.11	-0.21	0.05	911.02	1.47	0.23	0.29	0
375	-0.16	0	0.05	859.72	1.02	0.43	0.42	0
376	-0.18	-0.12	0.05	880.85	1.3	0.57	0	1
377	-0.08	-0.6	0.05	1012.34	2.5	0.09	0.06	0
378	-0.6	-1.59	0.05	1048.48	4.32	0.01	0.02	0
379	-1.44	-1.71	0.04	803.25	5.87	0.2	0.02	2
380	-2.09	-1.8	0.04	644.73	6	0.62	-0.56	30
381	-2.41	-1.84	0.04	422.8	3.61	1.06	0.02	75
382	-2.08	-1.99	0.04	286.08	1.48	1.09	0.64	29
383	-1.75	-1.55	0.03	155.45	0.37	1.05	0.8	35
384	1.27	-0.81	0.04	1142	6.07	-1.22	-0.36	0
385	0.21	-0.81	0.04	911.71	7.49	-0.46	-0.45	1
386	-1.05	-1.09	0.04	716.06	7.34	0.47	-0.36	3
387	-2.04	-1.62	0.04	468.77	3.93	1.04	0.06	0
388	-2.07	-1.64	0.04	287.24	1.72	1.46	0.29	25
389	-1.72	-1.1	0.03	153.48	0.37	1.75	0.58	103
390	1.3	0.5	0.04	897.24	3.58	-0.88	-0.21	0
391	1.83	-0.34	0.04	1147.31	6.64	-1.61	-0.63	2
392	1.05	-0.79	0.04	1132.71	8.41	-1.01	-0.88	0
393	-0.33	-0.85	0.04	719.08	7.63	0.15	-0.56	2
394	-1.86	-1.35	0.04	477.49	4.88	1.17	-0.48	10
395	-1.58	-1.03	0.03	275.53	2.14	1.38	0.15	39
396	-1.3	-0.46	0.03	158.67	0.35	1.64	-0.12	98
397	-1.28	-1.99	0.04	662.53	1.12	1.03	0.29	0
398	-1.39	-1.66	0.04	650.14	1.12	1.11	0.1	0
399	-1.08	-0.77	0.04	585.14	0.68	0.82	0	0
400	-0.65	0.1	0.04	588.01	0.23	0.9	0.44	1
401	-0.38	0.57	0.04	619.27	0.42	0.72	-0.04	0
402	0.27	1.04	0.04	744.71	0.43	0.2	-0.34	0
403	1.03	0.76	0.04	896.84	2.42	-0.66	-0.62	0
404	1.88	0.02	0.04	1147.84	6.13	-1.53	-0.84	0
405	1.28	-0.55	0.04	1172.96	7.83	-1.04	-1.15	0
406	0.09	-0.72	0.03	808.97	8.59	-0.18	-1.13	12
407	-0.7	-0.86	0.03	538.17	6.18	0.44	-0.58	32
408	-1.49	-2.12	0.04	660.5	0.99	1.01	0.31	1
409	-1.12	-1.03	0.04	610.32	0.93	0.88	0.01	1
410	-0.68	-0.14	0.04	586.33	0.39	0.81	0.27	0
411	-0.33	0.53	0.04	634.18	0.47	0.49	-0.08	1
412	0.05	0.76	0.04	718.13	0.57	0.3	-0.35	2
413	0.66	0.49	0.04	788.52	0.86	-0.53	-0.05	0
414	1.04	0.01	0.04	932.75	4.72	-0.96	-0.64	0
415	1.18	-0.76	0.04	1079.65	6.89	-1.18	-0.88	0
416	0.52	-0.84	0.03	896.95	8.43	-0.77	-0.78	1
417	0.16	-0.57	0.03	602.65	7.33	-0.14	-0.14	9
418	-0.37	0.09	0.03	335.08	2.73	0.88	0.22	89
419	-1.42	-2.41	0.04	741.18	1.51	0.89	-0.03	0
420	-1.17	-1.59	0.03	589.12	0.86	0.7	1	0
421	-0.33	-0.72	0.03	554.95	0.33	0.29	0.41	1
422	-0.47	-0.12	0.04	622.26	0.58	0.4	0.06	0
423	-0.27	0.03	0.04	688.24	0.72	0.23	-0.31	1
424	-0.11	-0.05	0.04	726.32	1.32	-0.09	-0.44	1
425	0.04	-0.28	0.04	866.46	4.01	-0.39	-0.52	0
426	0.66	-0.96	0.04	1044.56	5.93	-0.92	-0.45	0
427	0.39	-1.09	0.03	904.26	7.12	-0.8	-0.6	1
428	0.27	-0.58	0.03	626.42	7.23	-0.35	-0.07	4
429	0.54	0.07	0.04	423.57	4.41	-0.05	-0.33	66
430	-0.28	-0.04	0.05	260.87	2	0.51	-0.61	75
431	-1.17	-0.42	0.04	177.16	0.27	1.01	-0.47	88
432	-1.28	-2.68	0.03	755.44	1.33	0.59	-0.32	0
433	-1.62	-2.25	0.03	743.19	1.87	0.91	-0.32	1
434	-0.94	-1.45	0.03	577.02	1	0.46	0.32	0
435	-0.92	-0.89	0.04	612.46	0.79	0.55	-0.43	0
436	-0.88	-0.68	0.04	640	0.79	0.46	-0.33	1
437	-0.53	-0.51	0.04	661.26	0.84	0.08	-0.31	16
438	-0.61	-0.6	0.04	768.03	2.88	-0.15	-0.35	2
439	-0.01	-0.99	0.03	862.31	4.6	-0.54	-0.58	1
440	0.2	-1.27	0.03	908.19	5.73	-0.69	-0.51	1
441	0.43	-0.78	0.03	733.54	7.19	-0.74	-0.42	0
442	0.61	-0.52	0.04	513.88	6.05	-0.78	-0.18	13
443	-0.52	-0.77	0.05	318.2	2.87	-0.06	-1.13	89
444	-1.33	-1.14	0.05	238.29	1.54	0.41	-1.14	122
445	-0.99	-2.88	0.03	687.58	0.8	0.28	0.03	0
446	-0.94	-2.75	0.03	743.63	1.51	0.33	-0.29	0
447	-0.47	-2.07	0.03	577.91	1.02	0.02	-0.29	1
448	-1.02	-1.6	0.04	604.78	1.48	0.47	-0.69	1
449	-0.92	-1.22	0.04	649.75	1.62	0.4	-0.81	0
450	-0.82	-0.92	0.04	683.84	2.23	0.41	-0.71	0
451	-0.72	-0.71	0.04	746.71	2.99	0.39	-0.86	3
452	-0.33	-0.89	0.03	806.49	3.59	-0.2	-0.81	2
453	0.63	-0.96	0.03	918.72	6.03	-1.03	-0.58	0
454	0.54	-0.75	0.03	705.16	6.23	-0.78	-0.53	0
455	0.35	-0.88	0.04	555.17	6.21	-0.91	-0.76	0
456	-0.87	-1.34	0.05	390.66	3.93	-0.23	-1.17	44
457	-1.26	-1.74	0.05	302.14	3	-0.27	-1.68	57
458	-0.72	-1.29	0.04	586.35	1.83	0.19	-0.98	1
459	-0.7	-0.97	0.04	714.09	3.58	0.17	-1.13	1
460	-0.23	-0.66	0.04	832.03	4.05	-0.21	-1.11	0
461	0.02	-0.55	0.03	868.95	4.1	-0.26	-0.97	1
462	0.57	-0.59	0.03	932.05	4.88	-0.76	-0.95	0
463	1	-0.63	0.03	760.56	6.49	-1.1	-1.23	0
464	0.33	-0.82	0.04	535.12	5.19	-0.83	-1.15	1
465	-0.8	-1.37	0.05	409.79	3.68	-0.32	-1.37	18
466	-1.75	-1.92	0.04	326.79	2.15	-0.02	-1.68	51
467	-1.72	-1.91	0.04	277.82	1.46	-0.09	-1.17	114
468	-0.65	-1.47	0.04	626.8	3.8	0.18	-1.17	1
469	-0.41	-0.98	0.04	682.95	3.95	-0.2	-1.13	1
470	0	-0.44	0.03	739.04	4.09	-0.32	-1.07	2
471	0.51	-0.16	0.02	902.17	5.28	-0.47	-0.92	0
472	0.91	0.03	0.02	873.9	5.87	-0.77	-0.85	0
473	1.02	-0.06	0.03	712.33	6.67	-0.72	-1.2	1
474	0.56	-0.47	0.04	569.96	5.47	-0.63	-0.73	3
475	-0.58	-1.06	0.04	431.79	3.76	-0.17	-0.87	17
476	-1.34	-1.77	0.04	342.23	1.97	-0.1	-1.23	26
477	-0.4	-1.41	0.04	729.02	6.33	-0.18	-0.65	0
478	-0.08	-1.03	0.03	797.26	5.38	-0.65	-0.79	1
479	0.33	-0.22	0.03	860.19	5.34	-0.64	-0.39	1
480	0.89	0.31	0.02	861.89	5.5	-0.58	-0.23	0
481	1.35	0.48	0.02	919.05	5.23	-0.74	-0.47	0
482	1.42	0.37	0.03	747.75	7.08	-0.6	-0.64	5
483	0.98	0.11	0.04	616.64	5.97	-0.45	-0.61	3
484	0.24	-0.49	0.04	476.41	4.06	-0.35	-0.63	8
485	-0.6	-1.33	0.04	381.75	2.79	0.07	-1.02	0
486	-0.7	-1.65	0.04	419.49	2.84	-0.2	-0.64	18
487	-0.27	-0.94	0.03	762.01	6.73	-0.23	-0.2	0
488	0.26	-0.01	0.02	926.18	6.41	-0.31	-0.16	0
489	1.02	0.54	0.02	963.68	5.31	-0.6	-0.11	1
490	1.6	0.71	0.02	978.26	5.56	-0.66	-0.57	0
491	1.73	0.85	0.03	800.1	6.69	-0.67	-0.36	0
492	1.55	0.61	0.03	675.44	6.06	-0.66	-0.43	1
493	0.77	-0.04	0.04	546.38	4.93	-0.32	-0.3	0
494	0.11	-0.93	0.04	470.73	3.41	0.08	-0.45	0
495	-0.39	-1.4	0.04	415.16	2.72	0.15	-0.58	8
496	0.04	-0.72	0.03	759.5	7.46	-0.21	-0.08	0
497	0.61	-0.05	0.03	744.41	7.11	-0.43	0.02	0
498	1.07	0.69	0.02	892.64	6.38	-0.49	0.09	0
499	1.44	0.95	0.03	981.05	6.04	-0.52	-0.5	0
500	1.85	0.93	0.03	917.12	7.77	-0.83	-0.24	0
501	1.65	0.8	0.03	830.46	7.41	-0.79	-0.07	0
502	1.07	0.18	0.03	681.05	5.71	-0.68	-0.29	0
503	0.45	-0.83	0.03	497.16	3.28	-0.55	-0.73	0
504	-0.36	-1.56	0.04	418.86	2.03	-0.29	-0.83	4
505	-0.08	-0.5	0.03	639.55	6.47	-0.16	-0.24	0
506	0.33	-0.04	0.03	754.22	7.02	-0.41	-0.01	0
507	0.97	0.64	0.03	799.85	6.49	-0.42	-0.05	0
508	1.32	0.81	0.03	944.57	7.07	-0.43	-0.16	0
509	-0.03	-1.27	0.03	523.79	4.36	-0.83	-0.4	0
510	-0.4	-1.67	0.03	590.83	6.76	-0.04	-0.05	0
511	-0.42	-1.12	0.03	663.68	7.06	-0.29	-0.15	0
512	0.37	-0.23	0.03	838.06	6.16	-0.44	-0.03	0
513	0.88	0.39	0.03	743.65	5.71	-0.52	-0.17	0
514	1	0.58	0.03	786.25	6.05	-0.51	-0.09	0
515	-0.41	-1.26	0.04	632.94	6.51	-0.08	-0.02	0
516	0.1	-0.53	0.04	649.14	6.27	-0.35	0.08	0
